# Supplementary material for: Construction of high efficiency non-doped deep blue emitters based on phenanthroimidazole: remarkable substitution effects on the excited state properties and device performance
Source: Royal Society of Chemistry journal article supplement (doi:10.1039/c4cp03284e), 2014-01-01
Supplement: c4cp03284e1.pdf [file c4cp03284e1.pdf]

Supporting Information

*for Physical Chemistry Chemical Physics*

## Supporting Information

### **Construction of High Efficiency Non-doped Deep Blue Emitter Based on Phenanthroimidazole: Remarkable Substitution Effects on the Excited State Properties and Device Performance**

*Zhiming Wang<sup>[a]\*</sup>, Ying Feng<sup>[a]</sup>, Shitong Zhang<sup>[b]</sup>, Yu Gao<sup>[b]</sup>, Zhao Gao<sup>[b]</sup>, Yanming Chen<sup>[a]</sup>, Xiaojuan Zhang<sup>[a]</sup>, Ping Lu<sup>[b]</sup>, Bing Yang<sup>[b]</sup>, Ping Chen<sup>[c]\*</sup>, Yuguang Ma<sup>[b]</sup>, Shiyong Liu<sup>[c]</sup>*

<sup>[a]</sup> School of Petrochemical Engineering, Shenyang University of Technology, Liaoyang 111003, China

<sup>[b]</sup> State Key Laboratory of Supramolecular Structure and Materials, Jilin University, Changchun 130012, China

<sup>[c]</sup> State Key Laboratory on Integrated Optoelectronics, College of Electronic Science and Engineering, Jilin University, Changchun 130012, China

## **Contents**

**1. Synthesis**

**2. Thermal Properties**

**3. CV Measurements**

**4. Optimized structures of BPPI and N-BPPI**

**5. S1 to S10 NTO of BPPI and N-BPPI**

**6. The solvatochromic Lippert-Mataga model**

**7. Electroluminescence devices**

## 1. Synthesis

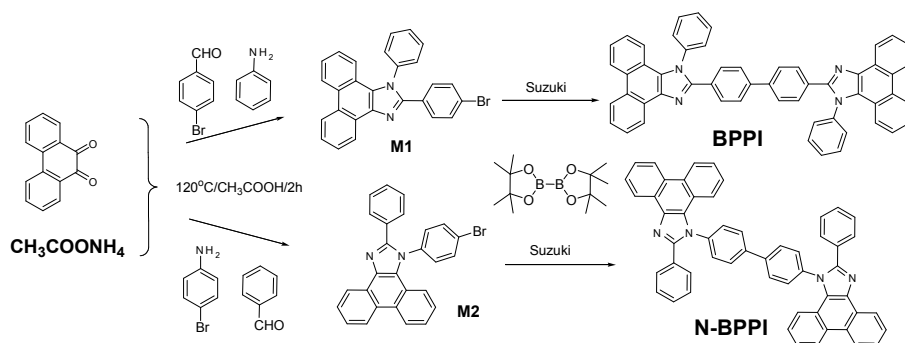

**Scheme S1** The synthetic routes to **BPPI** and **N-BPPI**.

### 2-(4-bromophenyl)-1-phenyl-1H-phenanthro[9,10-d]imidazole (M1)

A mixture of aniline (4.7 g, 50.0 mmol), phenanthrenequinone (2.08 g, 10.0 mmol), benzaldehyde (1.85g, 10.0 mmol), ammonium acetate (3.08 g, 40.0mmol), and acetic acid (80 mL) was heated under nitrogen in an oil bath to 120 °C. The mixture was maintained at this temperature for 2 h, and then cooled and filtered. The solid product was washed with an acetic acid/water mixture (1:1, 150 mL X 2), and washed with water to obtain the light-yellow crystals (4.09 g, 91.4% yield).  $^1\text{H}$  NMR (500 MHz, DMSO, ppm): 8.94 (d, 1H), 8.88 (d, 1H), 8.69 (d, 1H), 7.78 (t, 1H), 7.75-7.60 (m, 6H), 7.60-7.54 (m, 3H), 7.50 (d, 2H), 7.34 (t, 1H), 7.08 (d, 1H). MALDI-TOF ( $m/z$ ):  $[\text{M}^+]$  calcd.  $\text{C}_{27}\text{H}_{17}\text{N}_2\text{Br}$ , 448.06; found, 450.3.

### 1-(4-bromophenyl)-2-phenyl-1H-phenanthro[9,10-d]imidazole (M2)

A mixture of 4-bromobenzeneamine (8.5 g, 50.0 mmol), phenanthrenequinone (2.08 g, 10.0 mmol), benzaldehyde (1.06g, 10.0 mmol), ammonium acetate (3.08 g, 40.0mmol), and acetic acid (80 mL) was heated under nitrogen in an oil bath to a bath temperature of 120 °C. The mixture was maintained at this temperature for 2 h, and then cooled and filtered. The solid product was washed with an acetic acid/water mixture (1:1, 150 mL X 2) and washed with water to obtain the light-yellow crystals (4.19 g, 93.0% yield).  $^1\text{H}$  NMR (500 MHz, DMSO, ppm): 8.95 (d, 1H), 8.89 (d, 1H), 8.73 (d, 1H), 7.89(d, 1H), 7.78 (t, 1H), 7.73-7.64 (m, 4H), 7.47-7.31 (m, 3H), 7.10 (d,

1H). MALDI-TOF ( $m/z$ ):  $[M+]$  calcd.  $C_{27}H_{17}N_2Br$ , 448.06; found, 451.3.

**BPPI or N-BPPI:** A mixture of M1 or M2 (0.5 g, 1.12 mmol), 4,4,4',4',5,5,5',5'-octamethyl-2,2'-bi(1,3,2-dioxaborolane) (0.15 g, 0.56 mmol),  $Pd(PPh_3)_4$  (25 mg, 0.03 mmol), and sodium carbonate (0.53 g, 5 mmol) in THF (20 mL) and distilled water (2.5 mL) was refluxed for 2 d under nitrogen. The crude product was concentrated by rotary evaporation and filtered. After drying at 40°C in a vacuum baking oven, the powder was purified by column chromatography.

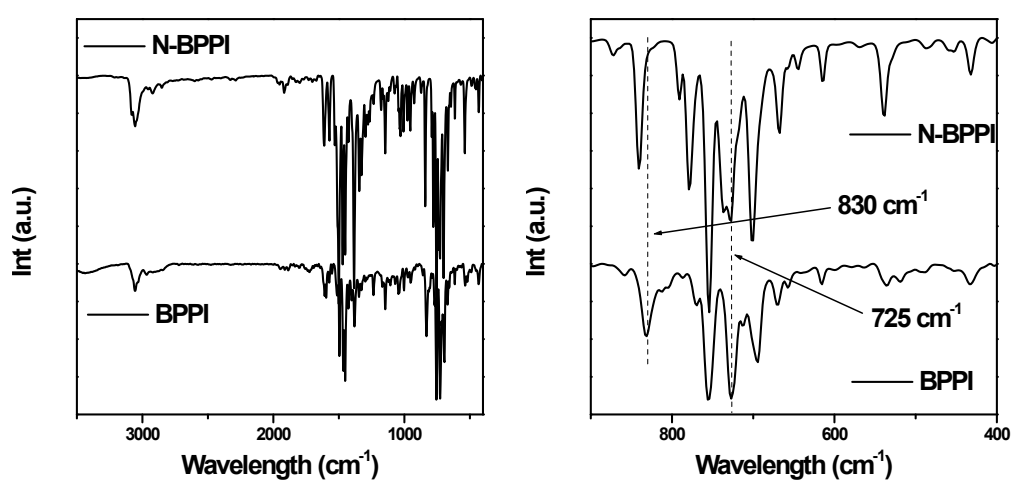

Fig. S1 FTIR spectra of **BPPI** and **N-BPPI**.

## 2. Thermal Properties

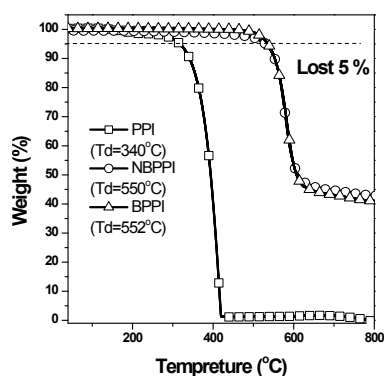

Fig. S2 The TGA graphs of **BPPI** and **N-BPPI**.

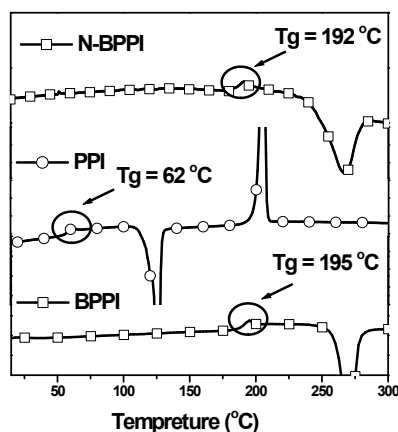

**Fig. S3** The DSC graphs of PPI, BPPI and N-BPPI.

### 3. CV Measurements

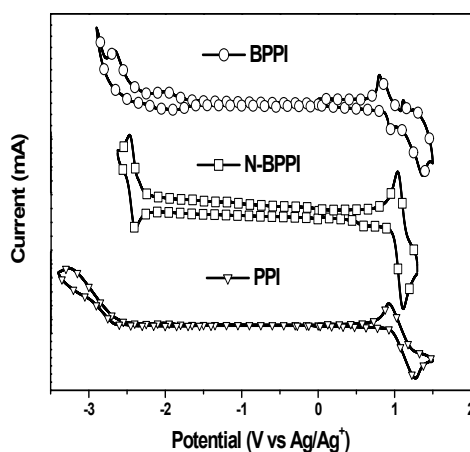

**Fig. S4** The CV curve of PPI, BPPI and N-BPPI.

**Tab. S1** Electrochemical data for PPI, BPPI and N-BPPI.

|              | $E_{\text{onset}}^{\text{ox}}$<br>(V) | $E_{\text{onset}}^{\text{red}}$<br>(V) | HOMO <sup>[a]</sup><br>(eV) | LUMO <sup>[a]</sup><br>(eV) | $E_{\text{gap}}$<br>(eV) |
|--------------|---------------------------------------|----------------------------------------|-----------------------------|-----------------------------|--------------------------|
| <b>PPI</b>   | 0.95                                  | -2.65                                  | -5.53                       | -2.07                       | 3.46                     |
| <b>BPPI</b>  | 0.89                                  | -2.43                                  | -5.47                       | -2.29                       | 3.18                     |
| <b>NBPPI</b> | 0.98                                  | -2.34                                  | -5.59                       | -2.34                       | 3.32                     |

[a]. Calculated by comparing with ferrocene (Fc) (4.8 eV) and calibrated using  $E_{1/2}$  (Fc/Fc<sup>+</sup>) measurement.

Because the electrolyte concentration influenced the onset oxidation/reduction potential, the values of HOMO/LUMO was inaccurate by estimating only from the data above. For increasing the accuracy, the ferrocene was usually applied as a reference to calibrate this difference. Concretely in every measurement, the compound

was dissolved in CH<sub>2</sub>Cl<sub>2</sub> or DMF with  $\sim 0.1$  M tetra-n-butylammonium - hexafluorophosphate (n-Bu<sub>4</sub>NPF<sub>6</sub>) at room temperature, and the CV sweep was done to get the onset oxidation/reduction potential ( $E_{\text{onset}}^{\text{ox}}$  or  $E_{\text{onset}}^{\text{red}}$ ). In the same concentration of electrolyte, the CV sweep of ferrocene was also done to gain the calibrated value of  $E_{1/2}$  (Fc/Fc<sup>+</sup>). At last, the more accurate values of HOMO/LUMO were calculated as below:

$$E_{\text{HOMO}} = - | eE_{\text{onset}}^{\text{ox}} + (4.80\text{eV} - E_{1/2}(\text{Fc/Fc}^+)) |$$

$$E_{\text{LUMO}} = - | eE_{\text{onset}}^{\text{red}} + (4.80\text{eV} - E_{1/2}(\text{Fc/Fc}^+)) |$$

#### 4. Optimized structures of BPPI and N-BPPI

Table.S2 The optimized twist angles in the lowest energy ground state.

|               | <i>NI-TA</i>  | <i>C2-TA</i>  | <i>B-TA</i>   |
|---------------|---------------|---------------|---------------|
| <b>BPPI</b>   | <b>80.6 °</b> | <b>30.2 °</b> | <b>33.6 °</b> |
| <b>N-BPPI</b> | <b>77.7 °</b> | <b>32.3 °</b> | <b>37.1 °</b> |

#### 5. S1 to S10 NTO of BPPI and N-BPPI

##### BPPI

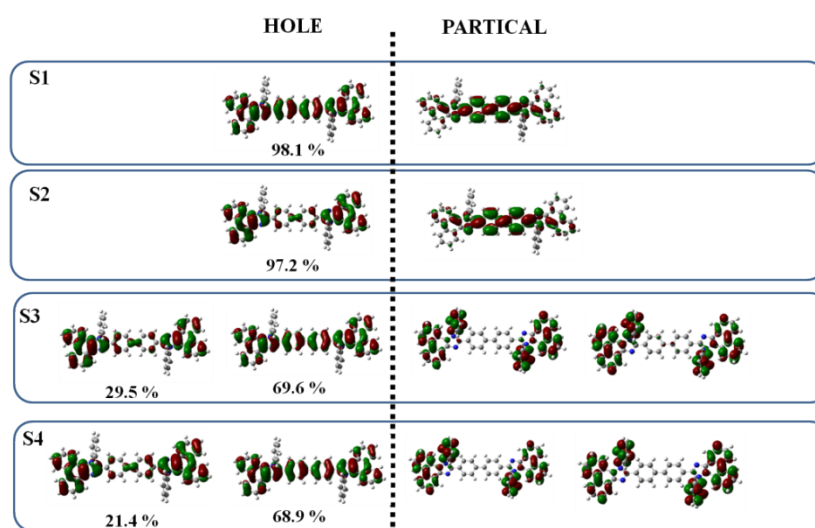

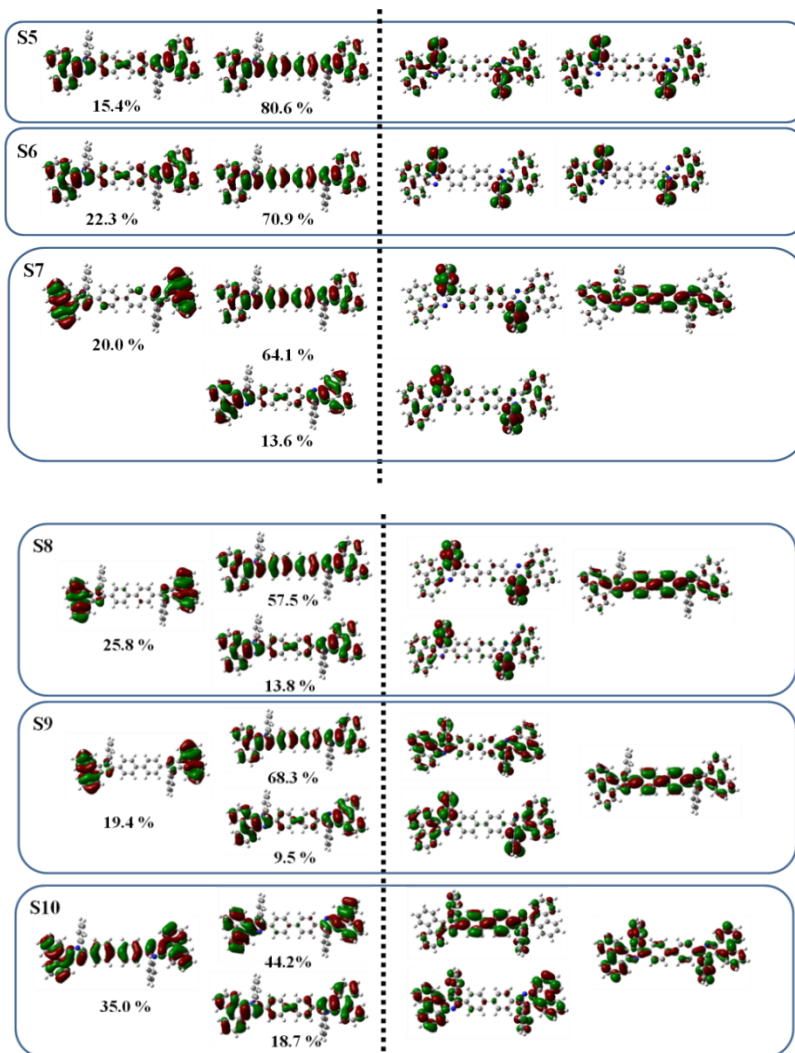

Fig. S5 S1 to S10 NTO of BPPI

N-BPPI

Fig. S6 S1 to S10 NTO of N-BPPI

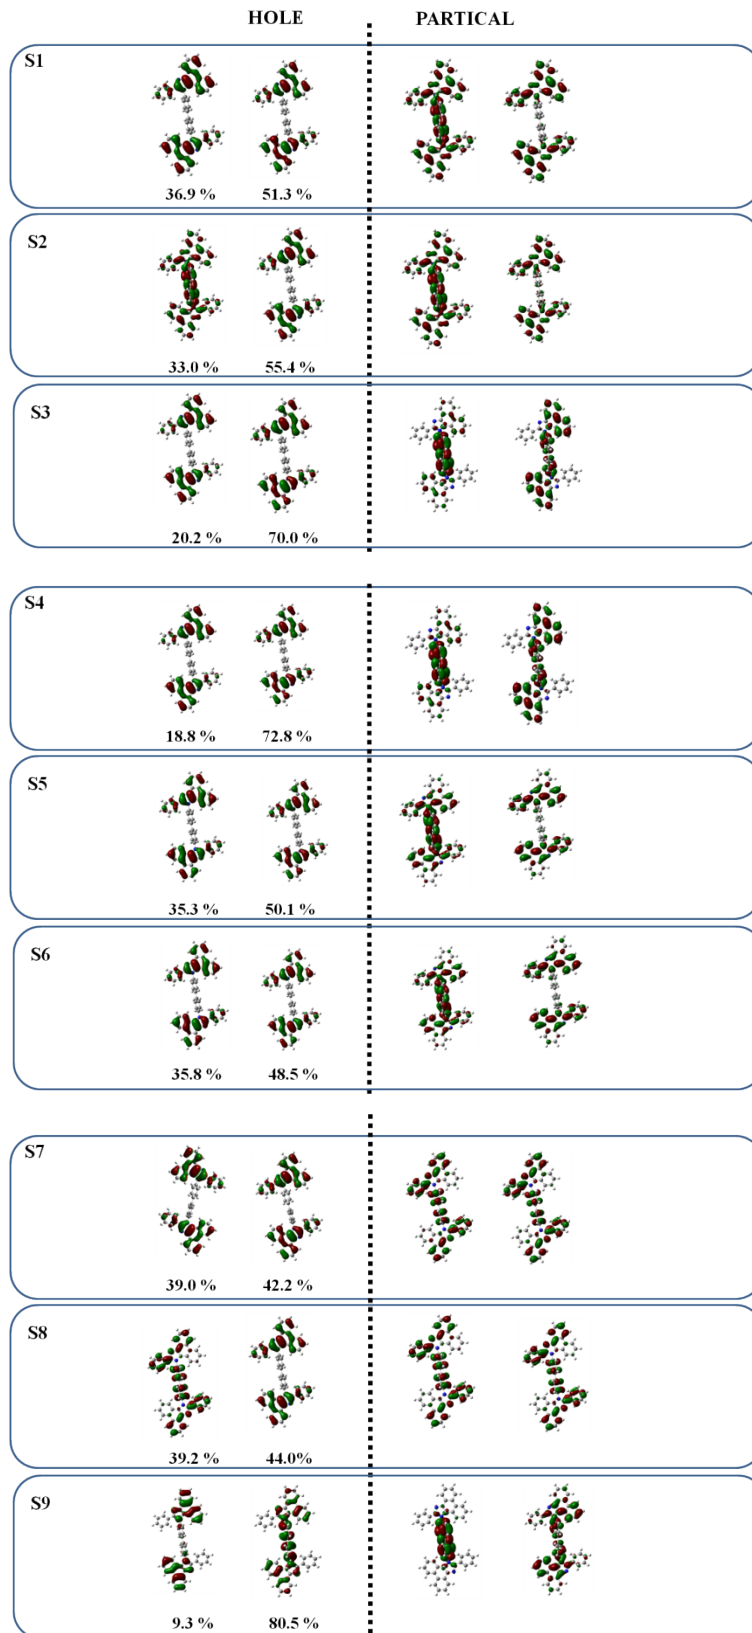



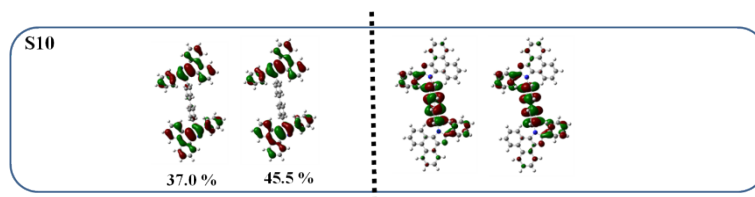

## 6. The solvatochromic Lippert-Mataga model

The Lippert-Mataga model is estimated according to **Equation 1** as shown below:

$$hc(\nu_a - \nu_f) = hc(\nu_a^0 - \nu_f^0) + \frac{2(\mu_e - \mu_g)^2}{a_0^3} f(\epsilon, n) \quad \text{Equation 1}$$

where  $h$  is the Plank constant,  $c$  is the light speed in vacuum,  $f(\epsilon, n)$  is the

orientational polarizability of solvents and  $f(\epsilon, n) = \left[ \frac{\epsilon - 1}{2\epsilon + 1} - \frac{n^2 - 1}{2n^2 - 1} \right]$ ,  $\nu_a^0 - \nu_f^0$  is the

Stokes shifts when  $f$  is zero,  $a_0$  is the solvent Onsager cavity radius,  $\mu_e$  and  $\mu_g$  are dipole moments of excited-state and ground-state, respectively.  $\epsilon$  is the solvent dielectric constant and  $n$  is the solvent refractive index.  $a_0$  and  $\mu_g$  were estimated at the level of b3lyp/6-31g(d,p) from the Gaussian09 package.

Results: **BPPI** ( $a_0=0.714$  nm and  $\mu_g = 4.579$ D) **N-BPPI** ( $a_0=0.699$  nm and  $\mu_g = 0.2693$ D)

**Table-S3 The solvatochromic properties of BPPI**

| BPPI                |                  |                  |                  |                                     |
|---------------------|------------------|------------------|------------------|-------------------------------------|
| Solvents            | $f(\epsilon, n)$ | $\lambda_a$ (nm) | $\lambda_f$ (nm) | $\nu_a - \nu_f$ (cm <sup>-1</sup> ) |
| Hexane              | 0.0012           | 368              | 412              | 2902.06838                          |
| Ethylamine          | 0.048            | 369              | 414              | 2945.68163                          |
| Butylether          | 0.096            | 370              | 415              | 2930.64148                          |
| Ethylether          | 0.167            | 368              | 415              | 3077.52750                          |
| Ethylacetate        | 0.2              | 368              | 419              | 3307.56459                          |
| Tetrahydrofura<br>n | 0.21             | 369              | 421              | 3347.30188                          |
| Acetone             | 0.284            | 366              | 443              | 4749.04094                          |
| Acetonitrile        | 0.305            | 365              | 445              | 4925.35016                          |

In low-polarity solvents (the former six):

Slope = 2093.37370337; Correlation = 0.90452685;  $\mu_e = 7.80178524$

In high-polarity solvents (the latter five):

Slope = 14721.10104476; Correlation = 0.98619292;  $\mu_e = 20.68905984$

**Table-S4 The solvatochromic properties of N-BPPI**

| N-BPPI              |                  |                  |                  |                                     |
|---------------------|------------------|------------------|------------------|-------------------------------------|
| Solvents            | $f(\epsilon, n)$ | $\lambda_a$ (nm) | $\lambda_f$ (nm) | $\nu_a - \nu_f$ (cm <sup>-1</sup> ) |
| Hexane              | 0.0012           | 360              | 363              | 229.56841                           |
| Ethylamine          | 0.048            | 361              | 365              | 303.57075                           |
| Butylether          | 0.096            | 361              | 366              | 378.42665                           |
| Ethylether          | 0.167            | 360              | 366              | 455.37341                           |
| Ethylacetate        | 0.2              | 361              | 369              | 600.56002                           |
| Tetrahydrofura<br>n | 0.21             | 360              | 369              | 677.50678                           |
| Acetone             | 0.284            | 359              | 373              | 1045.50173                          |
| Acetonitrile        | 0.305            | 357              | 374              | 1273.23657                          |

In all solvents:

Slope = 3176.50335005; Correlation = 0.93557306;  $\mu_e = 9.61048417$

## 7. Electroluminescence devices

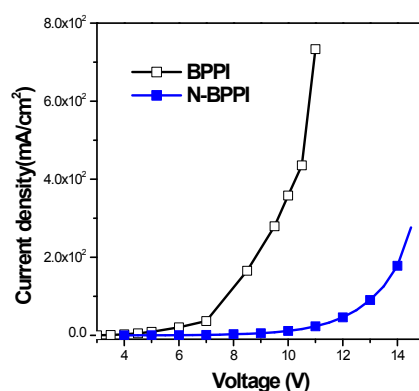

**Fig. S7** The current density versus voltage in the **BPPI** and **N-BPPI** devices.

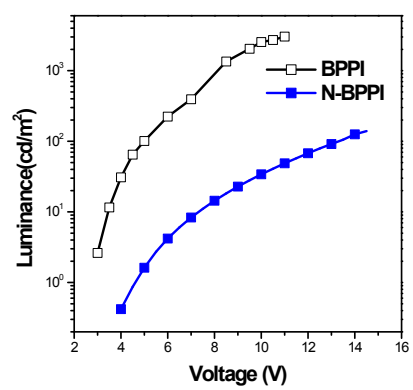

**Fig. S8** The luminance versus voltage in the **BPPI** and **N-BPPI** devices.
